# Supplementary material
Source: PubMed Central journal article supplement (PMC5520854)
Supplement: cr201739x2.pdf [file cr201739x2.pdf]

Figure S2

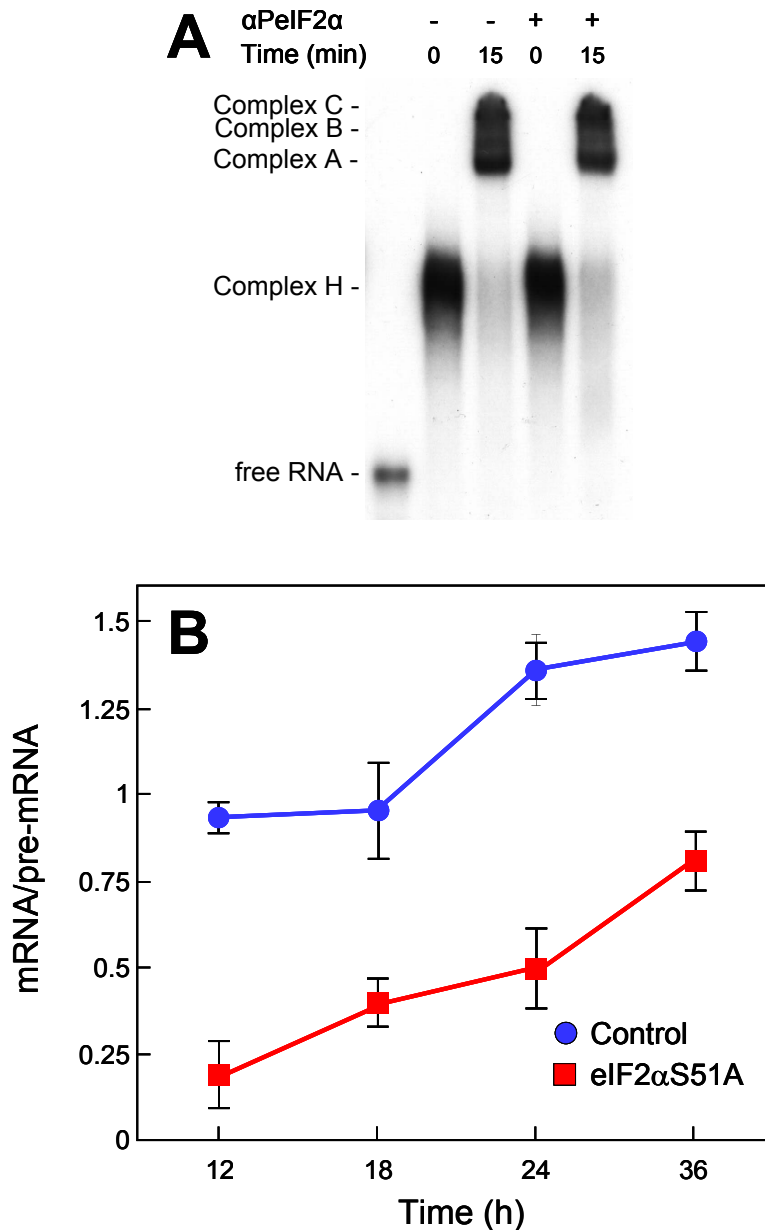

**Figure S2. Spliceosome formation on *MINX* RNA is resistant to inhibition by  $\alpha$ PeIF2 $\alpha$  mAb and eIF2 $\alpha$ S51A expression inhibits  $\beta$ -globin mRNA splicing.** (A) Spliceosome formation on *MINX* RNA. Spliceosome formation was assayed as in Figure 4C, using labeled *MINX* RNA and 3  $\mu$ g of  $\alpha$ PeIF2 $\alpha$  mAb. (B) Expression of nonphosphorylatable mutant eIF2 $\alpha$ S51A inhibits splicing of  $\beta$ -globin mRNA. HEK293T cells were co-transfected with equal amounts of  $\beta$ -globin gene vector, vector expressing human full-length eIF2 $\alpha$ S51A or empty vector (Control). At intervals after transfection, levels of spliced and unspliced  $\beta$ -globin transcripts were determined by qRT-PCR; splicing efficiency is expressed as the ratio of spliced RNA over unspliced RNA (mean  $\pm$  SEM; n = 3). Data in B and Figure 4G represent independent experiments.
