# Supplementary material
Source: PubMed Central journal article supplement (PMC5520854)
Supplement: cr201739x4.pdf [file cr201739x4.pdf]

Figure S4

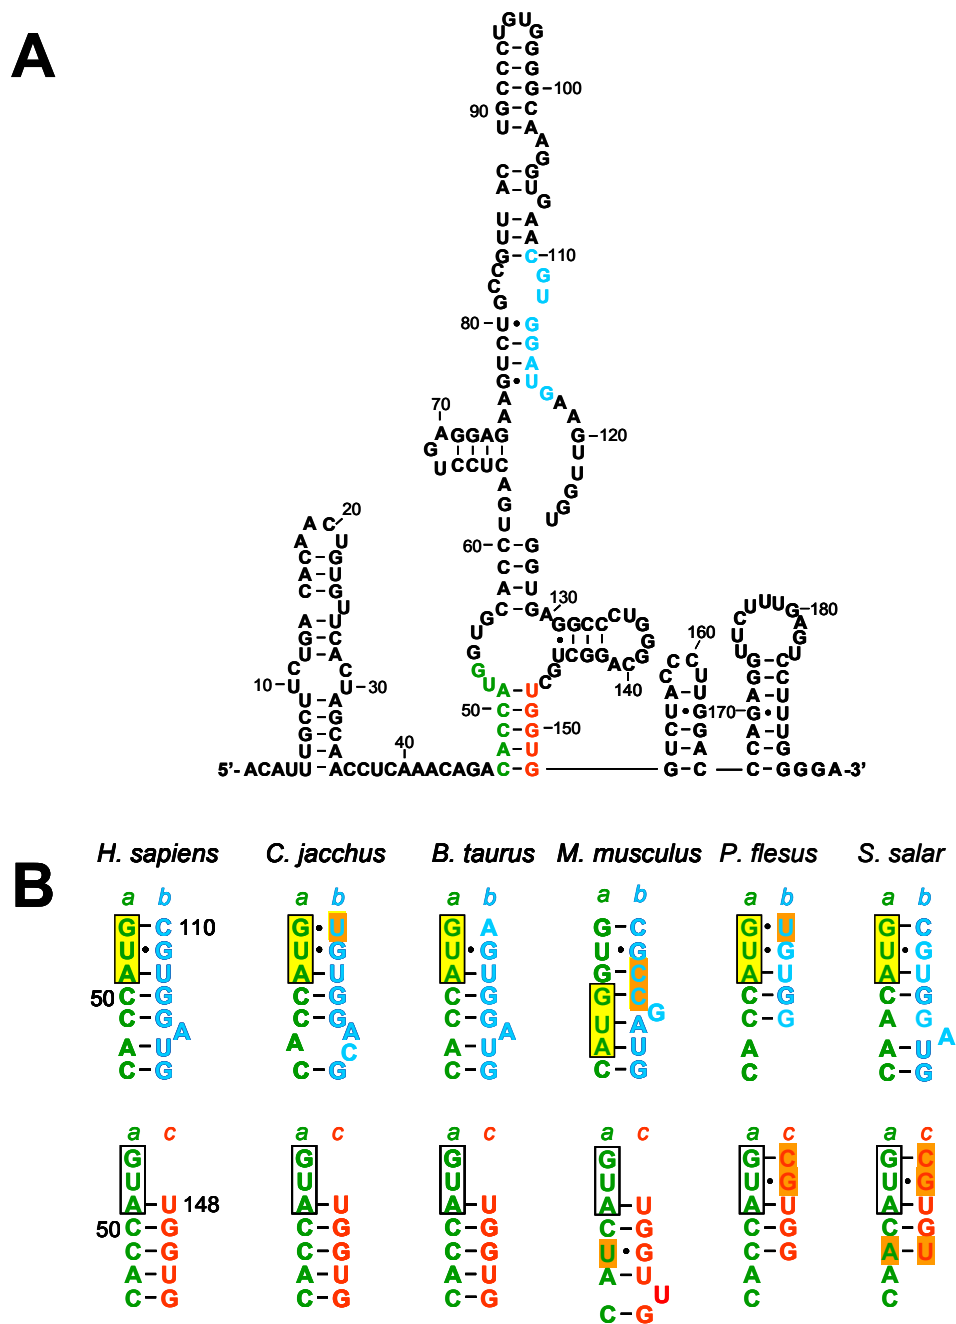

**Figure S4. Structure model and phylogenetic conservation of base pairing in unspliced and spliced  $\beta$ -globin mRNA.** (A) 2D structure model of the spliced 5'-terminal 193-nt exon 1/exon 2  $\beta$ -globin mRNA fragment. Coloring shows sequences *S1a* (green), *S1b* (light blue) and *S1c* (red). (B) Base pairing between helix S1 strands *a* and *b* (top) in  $\beta$ -globin pre-mRNA and strands *a* and *c* (bottom) in spliced mRNA is shown for *Homo sapiens*, *Callithrix jacchus*, *Bos taurus*, *Mus musculus* ( $\beta$ -globin major, Genbank accession number NM\_008220), *Platichthys flesus* (flounder) and *Salmo salar* (salmon). AUG initiation codon is boxed. Base pair covariation is shaded in orange.
