# Supplementary material
Source: PubMed Central journal article supplement (PMC5520854)
Supplement: cr201739x5.pdf [file cr201739x5.pdf]

Figure S5

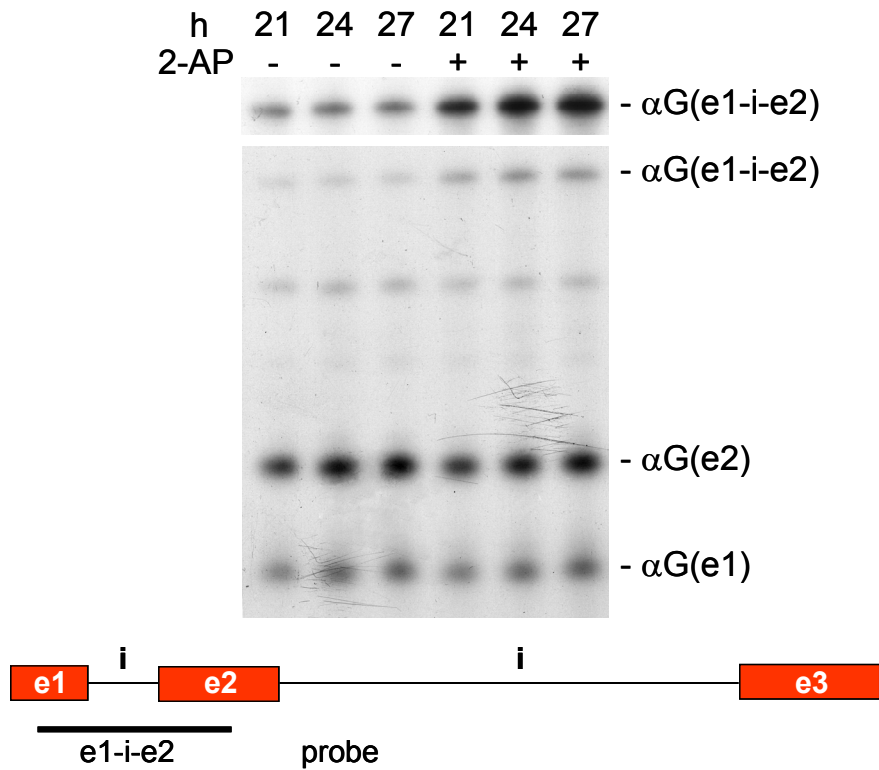

**Figure S5. 2-Aminopurine inhibits splicing of  $\alpha$ -globin mRNA.** HEK293T cells were transfected with the human  $\alpha 2$ -globin gene. 2-AP (15 mM) was added at 18 h after transfection. At times shown, expression of unspliced ( $\alpha G(e1-i-e2)$  protected band; autoradiogram at top shows a longer exposure) and spliced RNA ( $\alpha G(e1)$  and  $\alpha G(e2)$  bands) was assayed by RNase protection analysis using an RNA probe spanning 96 nt of exon 1, 117-nt intron 1 and 132 nt of exon 2 (map) that was generated from an NlaIII-NlaIII  $\alpha$ -globin gene fragment inserted into pBS. Ratio of  $\alpha G(e1-i-e2)$  over  $\alpha G(e2)$  bands is plotted in Figure 6A.
